# Supplementary material for: Four new species of Mesobiotus (Eutardigrada: Macrobiotidae) from Skåne, Sweden with an updated phylogeny of the genus
Source: Research Square preprint supplement (doi:10.21203/rs.3.rs-4785560/v1), 2024-08-27
Supplement: Supplementary file 1 [file 9a91c55dcb721a0e6d4845c3.xlsx]

## Sheet: Supp_T1_Primers
DNA Marker	Primer Name	Direction	Sequence 5'-3'	Source	Protocol
COI	LCO1490	forward	GGTCAACAAATCATAAAGATATTGG	Folmer et al 1994	5 min@94°C; (30sec@94°C, 30sec@45°C, 30sec@72°C)x40; 10min@72°C
	HCO2190	reverse	TAAACTTCAGGGTGACCAAAAAATCA	Folmer et al 1994
	HCO-OUT	reverse	CCAGGTAAAATTAAAATATAAACTTC	Schwendinger & Giribet 2005
18S	1F	forward	TACCTGGTTGATCCTGCCAGTAG	Giribet et al 1996	5 min@94°C; (30sec@94°C, 30sec@50°C, 45sec@72°C)x40; 10min@72°C
	5R	reverse	CTTGGCAAATGCTTTCGC	Giribet et al 1996
	3F	forward	GTTCGATTCCGGAGAGGGA	Giribet et al 1996	5 min@94°C; (30sec@94°C, 30sec@50°C, 45sec@72°C)x40; 10min@72°C
	Tar_3f	forward	CGCGCAAATTACCCACTC	Fujimoto et al 2017
	23R	reverse	TCTCGCTCGTTATCGGAAT	Giribet et al 1996
	5F	forward	GCGAAAGCATTTGCCAAGAA	Giribet et al 1996	5 min@94°C; (30sec@94°C, 30sec@50°C, 45sec@72°C)x40; 10min@72°C
	82R	reverse	TGATCCTTCTGCAGGTTCACCTAC	Sands et al 2008
28S	4.8AF	forward	ACCTATTCTCAAACTTTAAATGG	Guidetti et al 2014	5 min@94°C; (30sec@94°C, 1min@45°C, 1min@72°C)x35; 10min@72°C
	7b	reverse	GACTTCCCTTACCTACAT	Guidetti et al 2014
ITS	3F	forward	GCATCGATGAAGAACGCAG	Stec et al 2016	5 min@94°C; (1min@94°C, 2min@50°C, 2min@72°C)x30; 10min@72°C
	4R	reverse	AGTTTYTTTTCCTCCGCTTA	Stec et al 2016

## Sheet: Supp_T2_GenBank
Species	Specimen Identifier	GenBank Accession
		COI	18S	28S
Macrobiotus kyoukenus		ON809462	ON818316	ON818308
Macrobiotus macrocalix		MH057767	MH063926
Mesobiotus aradasi		OQ928738
Mesobiotus aradasi	ABDC_MF1	MW727931
Mesobiotus aradasi	ABDC_MF3	MW727932	MW751944
Mesobiotus aradasi	CC_MF4	MW727933
Mesobiotus aradasi	ABCD_MF8	MW727936
Mesobiotus aradasi	EBNI_MF2	MW727937	MW751952
Mesobiotus aradasi	EBNI_MF4	MW727938	MW751954
Mesobiotus aradasi	PSAI_MF2	MW727939
Mesobiotus aradasi	PSAI_MF7	MW727940
Mesobiotus aradasi	HMI_MF1	MW727941	MW751957
Mesobiotus aradasi	CC_MF1	MW727942	MW751949
Mesobiotus aradasi	CC_MF7	MW727943	KT226072	KT226080
Mesobiotus aradasi	AF01_MF2	MW727944	MW751946
Mesobiotus aradasi	FN01_MF6	MW727945	MW751955
Mesobiotus aradasi	macro05	JX865306	EU266928
Mesobiotus bockebodicus	22-044
Mesobiotus bockebodicus	22-044
Mesobiotus bockebodicus	22-045
Mesobiotus bockebodicus	22-048
Mesobiotus cf. barabanovi	KG002	MN313170	MN310392
Mesobiotus datanlanicus	VN026	MK578905	MK584659
Mesobiotus diegoi	ZA00101	OP143857	OP142527
Mesobiotus diegoi	ZA00102	OP143858	OP142526
Mesobiotus dilimanensis	PH006	MN257047	MN257048
Mesobiotus emiliae	22-046
Mesobiotus emiliae	23-027
Mesobiotus emiliae	23-043
Mesobiotus ethiopicus		MF678794	MF678793
Mesobiotus fiedleri	MG001	MH676056	MH681585
Mesobiotus furciger	macro06_282	JX865308
Mesobiotus furciger	macro06_161	JX865314
Mesobiotus furciger	macro06_162	MW727955	MW751934
Mesobiotus furciger	macro06_171	MW727956	MW751935
Mesobiotus furciger	macro06_296	MW727958	MW751936
Mesobiotus furciger	macro06_309	MW727959
Mesobiotus furciger	macro06_313	MW727960	MW751939
Mesobiotus furciger	macro06_310	MW727961	MW751937
Mesobiotus furciger	macro07_042	MW727957	MW751942
Mesobiotus harmsworthi	haplotype1	MH195150	MH197146
Mesobiotus harmsworthi	haplotype2	MH195151
Mesobiotus hilariae	C1_Novolazarevskaya	KT226108	KT226071
Mesobiotus hilariae	Novolazarevskaya_A1		KT226068
Mesobiotus hilariae	Novolazarevskaya_B		KT226070	KT226079
Mesobiotus hilariae	Novolazarevskaya_A2		KT226069
Mesobiotus huecoensis	S2027_1	OQ756246	OQ756249
Mesobiotus huecoensis	S2027_4	OQ756247	OQ756248
Mesobiotus imperialis	VN061_1	OL311514	OL257855
Mesobiotus imperialis	VN061_2	OL311515	OL257854
Mesobiotus insanis		MF441491	MF441488
Mesobiotus maklowiczi	ZA002_1	OP143855	OP142525
Mesobiotus maklowiczi	ZA002_2	OP143856	OP142524
Mesobiotus marmoreus	VN055_1	OL311516	OL257856
Mesobiotus marmoreus	VN055_2	OL311517	OL257857
Mesobiotus marmoreus	VN055_3	OL311518	OL257858
Mesobiotus occultatus		MH195152	MH197147
Mesobiotus occultatus	DT97_Splitsbergen	OR803042	OR794157
Mesobiotus passim	22-140
Mesobiotus passim	22-142
Mesobiotus passim	22-151
Mesobiotus passim	22-153
Mesobiotus passim	22-154
Mesobiotus passim	22-154
Mesobiotus passim	22-159
Mesobiotus passim	22-247
Mesobiotus peterseni	GL002.01	OP143859	OP142528
Mesobiotus peterseni	GL002.02	OP143860	OP142529
Mesobiotus philippinicus		KX129796	KX1297932
Mesobiotus polaris	Inespressible_Island_1		KT226077	KT226087
Mesobiotus polaris	Vegetation_Island_1		KT226075
Mesobiotus polaris	Inespressible_Island_2		KT226078
Mesobiotus polaris	Vegetation_Island_2		KT226076
Mesobiotus pseudoemiliae	22-115
Mesobiotus pseudoemiliae	22-207
Mesobiotus pseudoemiliae	22-210
Mesobiotus pseudoemiliae	22-214
Mesobiotus pseudoemiliae	22-215
Mesobiotus pseudoemiliae	22-217
Mesobiotus pseudoemiliae	22-218
Mesobiotus pseudoemiliae	22-233
Mesobiotus pseudoemiliae	22-239
Mesobiotus pseudoemiliae	22-239
Mesobiotus pseudoemiliae	22-244
Mesobiotus pseudoemiliae	22-405
Mesobiotus pseudoemiliae	22-442
Mesobiotus pseudoemiliae	23-050
Mesobiotus radiatus	KE008	MH195147	MH197153
Mesobiotus radiatus	KE008	MH195148
Mesobiotus romani	EC002	MH195149	MH197158
Mesobiotus skorackii	CN8	MW656257	MW680642
Mesobiotus sp.	ABDC_MF2		MW751943
Mesobiotus sp.	AF01_MF1		MW751945
Mesobiotus sp.	AF01_MF6	MW727948
Mesobiotus sp.	AF01_MF7	MW727949
Mesobiotus sp.	AF01_MF8	MW727950
Mesobiotus sp.	AF01MF4		MW751947
Mesobiotus sp.	BI02	OP684777
Mesobiotus sp.	BI03	OP684778
Mesobiotus sp.	BI04	OP684779
Mesobiotus sp.	CC_MF3		MW751948
Mesobiotus sp.	DPL_MF1		MW751950
Mesobiotus sp.	DVT2020	MT904513	MT903468
Mesobiotus sp.	DVT2023b_DT262_Lembolovo	OR803035	OR804457
Mesobiotus sp.	DVT2023b_DT266_Lembolovo	OR803036	OR804458
Mesobiotus sp.	DVT2023b_DT267_Lembolovo	OR803037	OR804459
Mesobiotus sp.	DVT2023b_DT268_Lembolovo	OR803038	OR804460
Mesobiotus sp.	DVT2023b_DT278_Lembolovo	OR803039
Mesobiotus sp.	DVT2023b_DT553_Vladivostok	OR803040	OR804461
Mesobiotus sp.	DVT2023b_DT554_Vladivostok	OR803041	OR804462
Mesobiotus sp.	EBNI_MF1		MW751951
Mesobiotus sp.	EBNI_MF3		MW751953
Mesobiotus sp.	FN01_MF7		MW751956
Mesobiotus sp.	HMI_MF5		MW751958
Mesobiotus sp.	JN07_MF1	MW727951	MW751959
Mesobiotus sp.	JN07_MF2	MW727946
Mesobiotus sp.	JN07_MF3	MW727952
Mesobiotus sp.	JN07_MF4	MW727953	MW751960
Mesobiotus sp.	JN07_MF5	MW727954
Mesobiotus sp.	JN07_MF8	MW727947	MW751961
Mesobiotus sp.	KPRI_MF1	MW727934	MW751962
Mesobiotus sp.	KPRI_MF8	MW727935
Mesobiotus sp.	LI_MF4		MW751963
Mesobiotus sp.	LI_MF6		MW751964
Mesobiotus sp.	LI_MF7		MW751965
Mesobiotus sp.	Macro06_159		MW751933
Mesobiotus sp.	Macro06_311		EU266929a
Mesobiotus sp.	Macro06_312		MW751938
Mesobiotus sp.	Macro07		EU266927
Mesobiotus sp.	Macro07_40		MW751940
Mesobiotus sp.	Macro07_42		MW751941
Mesobiotus sp.	MC-2011-1		HQ604967
Mesobiotus sp.	MC-2011-2		HQ604968
Mesobiotus sp.	MC-2011-3		HQ604969
Mesobiotus sp.	MC-2011-4		HQ604970
Mesobiotus sp.	Messina 1		KT226073	KT226083
Mesobiotus sp.	Messina 2		KT226074	KT226084
Mesobiotus sp.	mm2022-2.18.1.1	OP825090	OP829143
Mesobiotus sp.	mm2022-2.18.1.2	OP825091	OP829144
Mesobiotus sp.	NO234	MH195153	MH197148
Mesobiotus sp.	PSAI_MF1		MW751966
Mesobiotus sp.	PSAI_MF2		MW751967
Mesobiotus sp.	PSAI_MF3		MW751968
Mesobiotus sp.	PSAI_MF4		MW751969
Mesobiotus sp.	RU017	MH195154	MH197149
Mesobiotus sp.	S16_FL	OQ968323	OQ974689
Mesobiotus sp.	S1822_FL	OQ968325
Mesobiotus sp.	VN036	OQ968314	OQ974691
Mesobiotus zelmae	22-053
Mesobiotus zelmae	22-053b
Mesobiotus zelmae	22-054
Mesobiotus zelmae	22-054b
Mesobiotus zelmae	22-055
Mesobiotus zelmae	22-060
Mesobiotus zelmae	22-213
Mesobiotus zelmae	22-252
Mesobiotus zelmae	23-046
Mesobiotus zelmae	23-047
Mesobiotus zelmae	23-048
Mesobiotus zelmae	23-049
Mesobiotus zelmae	23-051
Mesobiotus zelmae	23-052
Paramacrobiotus tonolii		MH676018	DQ839605	FJ435756
Sisubiotus haikaiensis		OM523181	OM523056	OM523061
Tenuibiotus tenuiformis		MN888330	MN888378	MN888363
Xerobiotus gretae		MW581667	MW588437	MW588441
